# Supplementary material
Source: publisher figshare collection journal article supplement (https://tandf.figshare.com/articles/dataset/_/21829221)
Supplement: Supplementary file 1 [file 1]

## **Exposición de los terapeutas al tratamiento centrado en el trauma en la psicosis: efectos sobre la credibilidad, la carga esperada y las expectativas de sufrir daños**

David P. G. van den Berg, Berber M. van der Vleugel, Paul A.J.M. de Bont, Gwen Thijssen, Carlijn de Roos, Rianne de Kleine, Tamar Kraan, Helga Ising, Ad de Jongh, Agnes van Minnen and Mark van der Gaag

**Planteamiento:** Pese al gran apoyo empírico a la eficacia de los tratamientos centrados en el trauma, se ha probado que su difusión es difícil, especialmente en relación a pacientes con psicosis comórbida. Muchos terapeutas tienen creencias negativas sobre la credibilidad, la carga, y el daño de dicho tratamiento.

**Objetivo:** Este estudio de viabilidad explora el impacto de la formación especializada en las creencias de los terapeutas con respecto al tratamiento centrado en el trauma dentro de un ensayo controlado aleatorio.

**Método:** La credibilidad, la carga esperada y las expectativas de daños puntuadas por el terapeuta ( $n = 16$ ) con respecto al tratamiento centrado en el trauma fueron evaluados al inicio del estudio, después de la formación teórica, después de la formación técnica, después de la formación práctica supervisada, y en un seguimiento 2 años más tarde. También se evaluaron las creencias de los terapeutas sobre credibilidad y carga en cuanto al tratamiento de cada paciente específico en el ensayo.

**Resultados:** Con el tiempo, la credibilidad puntuada por el terapeuta del tratamiento centrado en el trauma mostró un aumento significativo, mientras que la carga esperada por los terapeutas y sus expectativas de daños disminuyeron significativamente. Al tratar el trastorno por estrés postraumático (TEPT) en pacientes con trastornos psicóticos ( $n = 79$ ), la gravedad de los síntomas antes del tratamiento no se asoció con la credibilidad o la carga esperada puntuada por el terapeuta de ese tratamiento específico. El resultado del tratamiento no tuvo influencia en la credibilidad específica del paciente o las expectativas de carga de los terapeutas.

**Conclusiones:** Estos resultados apoyan la idea de que la formación especializada, incluida la formación práctica con supervisión, tiene efectos positivos a largo plazo sobre las creencias de los terapeutas acerca de la credibilidad, la carga y los daños en relación al tratamiento centrado en el trauma.

**Keywords:** TEPT; exposición prolongada; EMDR; formación; difusión

Name of translator: Miriam Ramos Morrison
