# Supplementary material
Source: publisher figshare collection journal article supplement (https://tandf.figshare.com/articles/dataset/_/21829221)
Supplement: Supplementary file 3 [file 1]

Badanie przekonań terapeutów w związku z skoncentrowaną na traumę terapią psychozy: wpływ na ocenę skuteczności, postrzeganych trudności i oczekiwania terapeutów.

David P. G. van den Berg, Berber M. van der Vleugel, Paul A.J.M. de Bont, Gwen Thijssen, Carlijn de Roos, Rianne de Kleine, Tamar Kraan, Helga Ising, Ad de Jongh, Agnes van Minnen and Mark van der Gaag

Wprowadzenie: Pomimo stosunkowo obszernego materiału empirycznego na temat skuteczności terapii skoncentrowanej na traumie, upowszechnienie tego typu leczenia w środowisku klinicznym napotyka na trudności, szczególnie w przypadku leczenia pacjentów z psychozą. Wielu terapeutów stosujących tego typu terapię napotyka wiele trudności w jej stosowaniu.

Cel: celem niniejszej pracy była ocena wpływu specjalistycznego treningu terapii w tego rodzaju terapii.

Metoda: Zbadano 16 terapeutów i ich przekonania, trudności i oczekiwania dotyczące tego rodzaju terapii dwa razy: raz i potem znów 2 lata później.

Wyniki: Po dwóch latach istotnie wzrosła postrzegana przez terapeutów skuteczność tego typu metody terapeutycznej. W leczeniu PTSD oraz wśród pacjentów z zaburzeniami psychicznymi (n=79) nasilenie symptomów przed terapią nie było związane ze stopniem szacowanej przez terapeutów skuteczności tego rodzaju terapii.

Konkluzja: wyniki tej pracy pokazują istotność prowadzenia specjalistycznych treningów w psychoterapii skoncentrowanej na traumę.

Słowa kluczowe: PTSD; przedłużona ekspozycja; EMDR; trening; upowszechnianie

Name of translator: Marcin Rzesutek, Faculty of Psychology, University of Warsaw, Poland

Citation: European Journal of Psychotraumatology 2016, 7: 31712 - <http://dx.doi.org/10.3402/ejpt.v7.31712>
